# Supplementary material
Source: publisher figshare collection journal article supplement (https://gsapubs.figshare.com/ndownloader/files/38161119)
Supplement: Supplementary file 1 [file 38161119]

## Sheet: Sheet1
	6. TABLE of Single zircon U-Pb isotopic analyses by LA-ICPMS
	Sample	Analyzed	Best age, concordant	± 1se	207Pb/235U	± 1se	206Pb/238U	± 1se	correl coef	206Pb/238U	± 1se	207Pb/235U	± 1se	208Pb/232Th	± 1se	208Pb/232Th	± 1se	207Pb/206Pb	± 1se	207Pb/206Pb	± 1 se
		grain			Ratio		Ratio			Age Ma		Age Ma		Ratio		Age Ma				Age(Ma)
Miocene rock
	MH	1	21.1	0.25	0.0243	0.0005	0.00328	4e-05	0.50986	21.1	0.3	24	0	0.00106	2e-05	22	0
	MH	2	21.3	0.28	0.0202	0.0006	0.0033	4e-05	0.377832	21.3	0.3	20	1	0.00098	2e-05	20	0
	MH	3	21.2	0.27	0.0215	0.0005	0.00329	4e-05	0.463302	21.2	0.3	22	1	0.00106	2e-05	21	0
	MH	4	19.9	0.24	0.0215	0.0005	0.0031	4e-05	0.485164	19.9	0.2	22	1	0.00098	2e-05	20	5
	MH	5			0.0273	0.0006	0.00345	4e-05	0.466592	22.2	0.3	27	1	0.001	2e-05	20	3
	MH	6	20	0.25	0.0211	0.0006	0.00311	4e-05	0.41211	20	0.3	21	1	0.00107	3e-05	22	1
	MH	8			0.0385	0.0019	0.00365	7e-05	0.362219	23.5	0.5	38	2	0.00128	6e-05	26	1
	MH	9	20.2	0.26	0.0203	0.0006	0.00313	4e-05	0.396867	20.2	0.3	20	1	0.00102	3e-05	21	1
	MH	10	20	0.34	0.02	0.001	0.00311	5e-05	0.306108	20	0.3	20	1	0.00099	4e-05	20	1
Late Cretaceous rocks
	CH	1	72.5	0.8	0.0767	0.001	0.01132	0.00012	0.630861	72.5	0.8	75	1	0.00314	5e-05	63	1
	CH	2	1560	30	3.2104	0.0407	0.24143	0.00263	0.651721	1394.1	13.7	1460	10	0.07227	0.0013	1410	24	0.0964	0.0016	1560	30
	CH	3	1510	20	3.1458	0.0352	0.24161	0.00245	0.671512	1395.1	12.7	1444	9	0.06185	0.00108	1213	21	0.0944	0.0014	1510	20
	CH	4			1.3629	0.0263	0.03666	0.00057	0.627413	232.1	3.6	873	11	0.00984	0.00028	198	6
	CH	5			0.4429	0.0056	0.03787	0.00043	0.668155	239.6	2.6	372	4	0.01774	0.00032	355	6
	CH	6			0.094	0.0015	0.01223	0.00014	0.582892	78.4	0.9	91	1	0.00369	7e-05	75	1
	CH	7			0.1657	0.0024	0.02248	0.00025	0.609004	143.3	1.6	156	2	0.00709	0.00012	143	3
	CH	8	1555	20	3.491	0.0363	0.26271	0.00255	0.682377	1503.7	13	1525	8	0.07224	0.00108	1410	20	0.0964	0.0014	1555	20
	CH	9			0.1057	0.0016	0.01234	0.00013	0.571234	79	0.9	102	1	0.00337	6e-05	68	1
	CH	10			2.8046	0.0431	0.2154	0.00265	0.624962	1257.5	14.1	1357	12	0.04332	0.00128	857	25	0.094433	0.0016	1515	25
	CH	11	77.3	0.9	0.0813	0.0014	0.01207	0.00015	0.585203	77.3	0.9	79	1	0.00326	6e-05	66	1
	CH	12			0.1329	0.0026	0.0111	0.00015	0.568342	71.2	0.9	127	2	0.0048	0.00011	97	2
	CH	13			0.089	0.0021	0.01146	0.00014	0.459774	73.5	0.9	87	2	0.00415	0.0001	84	2
	CH	14	1390	30	2.6401	0.0415	0.21674	0.00232	0.562852	1264.6	12.3	1312	12	0.0659	0.00177	1290	34	0.0883	0.0017	1390	30
	CH	15	72.9	0.9	0.0714	0.0019	0.01137	0.00015	0.444175	72.9	0.9	70	2	0.00374	0.00011	75	2
	CH	16	138.9	1.8	0.1526	0.004	0.02178	0.00028	0.440341	138.9	1.8	144	4	0.00681	0.00016	137	3
	CH	17	70.9	0.8	0.0712	0.0013	0.01107	0.00012	0.51051	70.9	0.8	70	1	0.00328	7e-05	66	1
	CH	18	71.9	0.9	0.0778	0.0019	0.01121	0.00013	0.428952	71.9	0.9	76	2	0.00369	0.0001	74	2
	CH	19			0.3504	0.0084	0.01314	0.00022	0.572589	84.2	1.4	305	6	0.01106	0.00043	222	9
	CX	1			0.1008	0.0017	0.01194	0.00014	0.570837	76.5	0.9	98	2	0.0043	8e-05	87	2
	CX	2			0.1262	0.0021	0.01251	0.00015	0.584607	80.2	0.9	121	2	0.00473	9e-05	95	5
	CX	3			0.139	0.0028	0.01224	0.00016	0.544355	78.4	1	132	2	0.00472	0.0001	95	1
	CX	4			0.1638	0.0032	0.02148	0.00027	0.541091	137	1.7	154	3	0.00796	0.00024	160	2
	CX	5	74.8	0.9	0.0819	0.0015	0.01167	0.00014	0.547933	74.8	0.9	80	1	0.00364	7e-05	73	3
	CX	6			0.125	0.0023	0.01182	0.00015	0.567754	75.7	1	120	2	0.00452	0.0001	91	2
	CX	7	188.4	2	0.205	0.0024	0.02966	0.00032	0.677676	188.4	2	189	2	0.00833	0.00013	168	2
	CX	8			0.1037	0.002	0.01209	0.00015	0.541021	77.5	1	100	2	0.00433	0.0001	87	23
	CX	9	81.3	1	0.0875	0.0018	0.01269	0.00016	0.522564	81.3	1	85	2	0.0043	0.0001	87	4
	CX	10			2.2283	0.0303	0.13519	0.00154	0.642174	817.4	8.8	1190	10	0.04948	0.0012	976	1
	CX	11	74	0.9	0.0799	0.0017	0.01155	0.00014	0.495004	74	0.9	78	2	0.00349	8e-05	70	2
	CX	12	1585	30	3.4433	0.0404	0.25499	0.00252	0.644226	1464.1	13	1514	9	0.07945	0.00179	1545	33	0.0979	0.0015	1585	30
	HM	1	81.7	0.8	0.0846	0.0011	0.01276	0.00012	0.586055	81.7	0.8	83	1	0.00554	0.00019	112	3
	HM	2			0.0935	0.0012	0.01184	0.00013	0.650073	75.9	0.8	91	1	0.00408	6e-05	82	1
	HM	3	73	1.5	0.0635	0.0046	0.01139	0.00024	0.279298	73	1.5	63	4	0.00321	0.00012	65	3
	HM	4	73.5	0.9	0.08	0.0011	0.01146	0.00013	0.636385	73.5	0.9	78	1	0.00347	6e-05	70	1
	HM	5	164.3	1.9	0.1772	0.0032	0.02581	0.0003	0.541227	164.3	1.9	166	3	0.00761	0.00012	153	23
	HM	6			0.0896	0.0012	0.01207	0.00014	0.654668	77.4	0.9	87	1	0.00374	7e-05	75	28
	HM	7			3.6749	0.043	0.25026	0.00255	0.656715	1439.8	13.1	1566	9	0.06755	0.00119	1321	3	0.106501	0.0016	1740	30
	HM	8	1675	30	3.8722	0.0489	0.27315	0.00311	0.669616	1556.8	15.8	1608	10	0.07869	0.00151	1531	1	0.1028	0.0017	1675	30
	HM	9	83.3	1.2	0.0911	0.0022	0.01301	0.00019	0.517478	83.3	1.2	89	2	0.004	0.00017	81	2
	HM	10	71.6	0.9	0.0732	0.0014	0.01117	0.00013	0.519836	71.6	0.9	72	1	0.00352	7e-05	71	2
	HM	11			0.0985	0.0021	0.01128	0.00014	0.503109	72.3	0.9	95	2	0.00404	0.00011	82	2
	HM	12	77.7	1.1	0.087	0.0022	0.01213	0.00018	0.506116	77.7	1.1	85	2	0.0028	0.00011	57	3
	HM	13	73.5	1.2	0.0844	0.0038	0.01146	0.00019	0.345554	73.5	1.2	82	4	0.0035	0.0001	71	2
	HM	14			0.0956	0.0035	0.01113	0.00017	0.385034	71.4	1.1	93	3	0.00351	7e-05	71	1
	IM	1	77.7	1	0.0846	0.0016	0.01213	0.00016	0.572055	77.7	1	83	2	0.00343	0.00011	69	3
	IM	2	84.8	0.9	0.0933	0.0016	0.01323	0.00015	0.551504	84.8	0.9	91	2	0.00537	0.00016	108	25
	IM	3			0.1017	0.002	0.01352	0.00017	0.538687	86.5	1.1	98	2	0.005	0.00017	101	31
	IM	4			2.4922	0.0334	0.16677	0.00194	0.655506	994.3	10.7	1270	10	0.05692	0.00132	1119	3	0.108384	0.0016	1775	30
	IM	5	1435	20	2.8971	0.0355	0.23236	0.00246	0.653773	1346.9	12.9	1381	9	0.07019	0.00162	1371	8	0.0904	0.0014	1435	20
	IM	6			0.3397	0.0042	0.02918	0.00032	0.663563	185.4	2	297	3	0.0063	0.00013	127	8
	IM	7			1.781	0.0224	0.14389	0.00162	0.66697	866.6	9.1	1039	8	0.01964	0.00041	393	17
	IM	8			0.9791	0.0136	0.07435	0.00087	0.644275	462.3	5.2	693	7	0.01567	0.00041	314	31
	IM	9			2.69	0.0404	0.19475	0.00233	0.62308	1147.1	12.6	1326	11	0.02798	0.00089	558	68	0.100178	0.0016	1625	30
	IM	10	1652	30	3.9226	0.0475	0.2801	0.00303	0.66621	1591.9	15.3	1618	10	0.08044	0.00164	1564	4	0.1016	0.0016	1652	30
	IM	11	1728	40	4.4203	0.0852	0.30296	0.00404	0.568952	1706	20	1716	16	0.0814	0.00362	1582	1	0.1058	0.0024	1728	40
	IM	12			0.148	0.0021	0.01183	0.00012	0.581563	75.8	0.8	140	2	0.00718	0.00019	145	2
	KH	1			0.1003	0.0033	0.01264	0.0002	0.433402	81	1.3	97	3	0.00423	0.00014	85	3
	KH	2			0.0822	0.0016	0.01053	0.00013	0.53561	67.5	0.8	80	2	0.00344	7e-05	70	1
	KH	3	73	0.9	0.0776	0.0017	0.01138	0.00015	0.515551	73	0.9	76	2	0.00366	9e-05	74	1
	KH	4			0.0877	0.0015	0.01151	0.00014	0.579545	73.8	0.9	85	1	0.00379	7e-05	77	2
	KH	5	74.2	0.9	0.0771	0.0013	0.01158	0.00013	0.554202	74.2	0.9	75	1	0.0034	7e-05	69	6
	KH	6			0.1005	0.002	0.01105	0.00014	0.537048	70.8	0.9	97	2	0.00425	0.0001	86	2
	KH	7			0.1612	0.0056	0.01194	0.00023	0.484936	76.5	1.4	152	5	0.00551	0.00028	111	2
	KH	8	75	1	0.0836	0.002	0.0117	0.00016	0.496267	75	1	82	2	0.00368	0.00011	74	3
	KH	9			0.1198	0.0019	0.01114	0.00013	0.592656	71.4	0.8	115	2	0.0044	9e-05	89	2
	KH	10			0.2304	0.0036	0.01221	0.00015	0.618077	78.2	1	211	3	0.00586	0.00013	118	2
	KH	11			0.0857	0.0016	0.01034	0.00012	0.52793	66.3	0.8	84	2	0.00375	9e-05	76	3
	SH	1			0.8529	0.0132	0.06929	0.00078	0.588217	431.9	4.7	626	7	0.00477	0.00019	96	4
	SH	2	73	0.9	0.0749	0.0017	0.01138	0.00014	0.476526	73	0.9	73	2	0.00347	0.00012	70	2
	SH	3	69.7	0.9	0.0692	0.0016	0.01088	0.00013	0.459095	69.7	0.9	68	2	0.00323	0.0001	65	2
	SH	4	70.2	1	0.0724	0.0023	0.01094	0.00015	0.39627	70.2	1	71	2	0.00334	0.00016	67	3
	SH	5	75.1	0.9	0.0763	0.0018	0.01172	0.00015	0.476863	75.1	0.9	75	2	0.00398	0.00013	80	3
	SH	6	75.5	1.4	0.0771	0.0035	0.01178	0.00021	0.365525	75.5	1.4	75	3	0.00402	0.0003	81	6
	SH	7	124.5	1.6	0.1353	0.0029	0.0195	0.00025	0.513324	124.5	1.6	129	3	0.00763	0.0003	154	6
	SH	8			0.8847	0.024	0.01731	0.00039	0.638908	110.7	2.5	644	13	0.00744	0.00034	150	7
	SH	9	74.6	1.4	0.0838	0.0037	0.01164	0.00021	0.378251	74.6	1.4	82	3	0.00455	0.00049	92	10
	SH	10	71.6	0.9	0.0736	0.0016	0.01118	0.00013	0.471652	71.6	0.9	72	2	0.00358	9e-05	72	2
	SH	11	72.8	0.9	0.0793	0.002	0.01136	0.00015	0.463825	72.8	0.9	77	2	0.00397	0.00013	80	3
	SH	12	72.5	1.1	0.0762	0.0024	0.01131	0.00017	0.4307	72.5	1.1	75	2	0.00384	0.00019	78	4
	SH	13	75.2	1	0.0823	0.0024	0.01174	0.00016	0.423392	75.2	1	80	2	0.00378	0.0002	76	4
	TMd	1			0.3021	0.0053	0.02637	0.00033	0.580712	167.8	2.1	268	4	0.01011	0.00032	203	6
	TMd	2	77.1	1.5	0.0949	0.0045	0.01203	0.00023	0.373944	77.1	1.5	92	4	0.00459	0.0002	93	4
	TMd	3			0.1454	0.009	0.01281	0.00035	0.403818	82	2.2	138	8	0.00606	0.00039	122	8
	TMd	4	71.5	1.2	0.0824	0.0033	0.01115	0.00018	0.373867	71.5	1.2	80	3	0.0039	0.00014	79	3
	TMd	5			0.1876	0.0066	0.01175	0.00023	0.4862	75.3	1.4	175	6	0.00765	0.00035	154	7
	TMd	6			0.316	0.0142	0.01406	0.00037	0.505342	90	2.3	279	11	0.00754	0.00047	152	9
	TMd	7	177	3.2	0.2008	0.0073	0.02783	0.00051	0.450124	177	3.2	186	6	0.00904	0.00073	182	15
	TMd	8	77.4	1.9	0.0895	0.0059	0.01207	0.00029	0.342435	77.4	1.9	87	6	0.00513	0.00032	103	6
	TMd	9			0.202	0.0107	0.01366	0.00036	0.445444	87.4	2.3	187	9	0.02932	0.00238	584	47
	TMd	10			0.2817	0.0084	0.01317	0.00024	0.521461	84.3	1.6	252	7	0.00762	0.00033	153	7
	TMd	11			0.1369	0.005	0.01116	0.00021	0.458001	71.5	1.3	130	4	0.00551	0.00032	111	6
	TMd	12			0.3616	0.0084	0.01342	0.00022	0.576583	86	1.4	313	6	0.00961	0.0004	193	8
middle Cretaceous rock
	PO	1	1593	20	3.7124	0.0422	0.27416	0.00274	0.66029	1561.9	13.9	1574	9	0.08062	0.00155	1567	29	0.0982	0.0015	1593	20
	PO	2	99.8	1.4	0.1159	0.003	0.0156	0.00022	0.478429	99.8	1.4	111	3	0.00538	0.00024	109	5
	PO	3	94.2	1	0.1001	0.0014	0.01471	0.00015	0.589135	94.2	1	97	1	0.00489	0.00012	99	2
	PO	4	93.8	1.3	0.1008	0.0033	0.01465	0.00021	0.40109	93.8	1.3	98	3	0.00441	0.00018	89	4
	PO	5	1683	40	4.2866	0.0718	0.30141	0.00333	0.550605	1698.3	16.5	1691	14	0.08906	0.00329	1724	61	0.1031	0.002	1683	40
	PO	6	1705	30	3.5363	0.0561	0.24449	0.00299	0.610539	1410	15.5	1535	13	0.06369	0.0022	1248	42	0.104903	0.0016	1705	30
	PO	7	1665	20	3.7173	0.0398	0.26418	0.00251	0.663741	1511.2	12.8	1575	9	0.08659	0.00156	1678	29	0.1021	0.0015	1665	20
	PO	8	94.9	1.2	0.0984	0.0026	0.01483	0.00019	0.436296	94.9	1.2	95	2	0.00478	0.00022	96	4
	PO	9	1682	30	4.1654	0.0523	0.29301	0.00316	0.651574	1656.5	15.8	1667	10	0.08114	0.00171	1577	32	0.1031	0.0017	1682	30
	PO	10	1416	30	2.7519	0.0377	0.22262	0.00258	0.645853	1295.7	13.6	1343	10	0.06621	0.00157	1296	30	0.0897	0.0016	1416	30
	PO	11	1690	30	4.3008	0.051	0.30101	0.0031	0.655712	1696.3	15.4	1694	10	0.08759	0.00183	1697	34	0.1036	0.0016	1690	30
	PO	12	100.6	1.1	0.1107	0.0018	0.01572	0.00017	0.553783	100.6	1.1	107	2	0.00527	0.00013	106	3
	PO	13	1609	40	3.9137	0.0793	0.28668	0.0037	0.537239	1624.9	18.6	1617	16	0.08387	0.0035	1628	65	0.099	0.0023	1609	40
	PO	14	1685	30	4.1818	0.0574	0.29334	0.0033	0.633888	1658.2	16.5	1671	11	0.08285	0.00221	1609	41	0.1034	0.0018	1685	30
	PO	15	97.9	1.2	0.1015	0.002	0.0153	0.00018	0.512638	97.9	1.2	98	2	0.00483	0.00015	97	3
	PO	16	1628	30	3.7575	0.0571	0.27237	0.00328	0.621085	1552.8	16.6	1584	12	0.08698	0.00282	1686	52	0.1001	0.0019	1628	30
	PO	17	98.2	1.1	0.1014	0.0019	0.01535	0.00018	0.530498	98.2	1.1	98	2	0.00512	0.00015	103	3
Late Jurassic rocks
	LH	1	159.6	1.7	0.1695	0.0023	0.02506	0.00027	0.621829	159.6	1.7	159	2	0.00749	0.0001	151	2
	LH	2	160.1	1.9	0.1781	0.0032	0.02514	0.00031	0.565854	160.1	1.9	166	3	0.00791	0.00015	159	3
	LH	3			0.1898	0.0027	0.0253	0.00027	0.600101	161.1	1.7	176	2	0.0081	0.00011	163	2
	LH	4			0.3004	0.005	0.02555	0.00029	0.563397	162.6	1.8	267	4	0.00913	0.00015	184	3
	LH	5	157.3	1.7	0.1664	0.0023	0.0247	0.00027	0.620307	157.3	1.7	156	2	0.00771	0.00011	155	4
	LH	6			0.2736	0.004	0.0259	0.00029	0.608032	164.8	1.8	246	3	0.00859	0.00016	173	3
	LH	7			0.3447	0.0052	0.02571	0.00029	0.598826	163.7	1.8	301	4	0.00997	0.00022	201	3
	LH	8			0.218	0.0035	0.02522	0.00028	0.568769	160.6	1.7	200	3	0.00845	0.00017	170	3
	LH	9	168.6	2	0.1829	0.0028	0.0265	0.00031	0.607165	168.6	2	171	2	0.00807	0.00017	162	5
	LH	10	168.3	2	0.1832	0.0031	0.02645	0.00032	0.581607	168.3	2	171	3	0.00855	0.00017	172	1
	LH	13			0.2283	0.0041	0.02537	0.00032	0.57475	161.5	2	209	3	0.0085	0.00023	171	0
	MMd	1	160.9	2.1	0.1818	0.005	0.02527	0.00033	0.428927	160.9	2.1	170	4	0.00785	0.00019	158	4
	MMd	2			0.2027	0.004	0.02523	0.00027	0.476714	160.6	1.7	187	3	0.00844	0.00017	170	3
	MMd	3	174.9	2	0.1883	0.0031	0.0275	0.00032	0.577192	174.9	2	175	3	0.00905	0.0002	182	4
	MMd	4	168.5	2.3	0.1945	0.0052	0.02648	0.00037	0.463191	168.5	2.3	181	4	0.00952	0.00027	191	5
	MMd	5	166.4	1.7	0.1912	0.003	0.02615	0.00026	0.53526	166.4	1.7	178	3	0.00798	0.00014	161	3
	MMd	6			0.1903	0.0031	0.0249	0.00027	0.55411	158.5	1.7	177	3	0.00837	0.00017	169	3
	MMd	7	163.3	1.7	0.1817	0.0029	0.02566	0.00027	0.550418	163.3	1.7	170	3	0.00829	0.00018	167	4
	MMd	8	157.6	1.7	0.1709	0.003	0.02475	0.00027	0.527832	157.6	1.7	160	3	0.00797	0.00016	161	3
	MMd	9			0.2	0.0039	0.02493	0.00029	0.512311	158.7	1.8	185	3	0.0082	0.0002	165	4
	MMd	10			0.2104	0.0042	0.02502	0.00027	0.475555	159.3	1.7	194	3	0.00913	0.00021	184	4
	MMd	11	164.7	2.1	0.1849	0.0049	0.02587	0.00033	0.433717	164.7	2.1	172	4	0.00863	0.0003	174	6
	MMd	12	164.2	1.8	0.1782	0.0035	0.02579	0.00029	0.496849	164.2	1.8	167	3	0.00832	0.0002	168	4
	MMd	13	160.8	1.8	0.1822	0.0035	0.02525	0.00029	0.51316	160.8	1.8	170	3	0.0079	0.00023	159	5
	MMg	1	164.1	1.7	0.1802	0.0029	0.02579	0.00027	0.545302	164.1	1.7	168	2	0.00832	0.00014	168	3
	MMg	2			0.2083	0.0025	0.02551	0.00025	0.632477	162.4	1.6	192	2	0.00866	0.00014	174	3
	MMg	3			0.3693	0.0049	0.02918	0.00033	0.648681	185.4	2.1	319	4	0.01083	0.00023	218	5
	MMg	4			0.8571	0.0124	0.03196	0.00039	0.644744	202.8	2.4	629	7	0.01882	0.00051	377	10
	MMg	5			0.2693	0.0051	0.02675	0.00031	0.521961	170.2	1.9	242	4	0.00932	0.00031	188	6
	MMg	6			1.0941	0.0227	0.03254	0.00048	0.579451	206.5	3	751	11	0.01908	0.00068	382	13
	MMg	7	169.1	2.1	0.1829	0.0032	0.02658	0.00033	0.578713	169.1	2.1	171	3	0.00845	0.00025	170	5
	MMg	8	163.9	2.1	0.1779	0.0047	0.02575	0.00033	0.436443	163.9	2.1	166	4	0.00826	0.00031	166	6
	MMg	9			0.1851	0.0036	0.02472	0.00028	0.503262	157.4	1.8	172	3	0.00866	0.00032	174	6
	MMg	10			0.2399	0.0033	0.02556	0.00027	0.60906	162.7	1.7	218	3	0.0086	0.00021	173	4
	MMg	11	157	1.8	0.1696	0.0033	0.02466	0.00029	0.517255	157	1.8	159	3	0.00797	0.00026	160	5
	MMg	12			0.2481	0.0046	0.02585	0.00032	0.555275	164.5	2	225	4	0.00899	0.00029	181	6
	MMg	13	165.6	2.1	0.173	0.0034	0.02602	0.00033	0.54222	165.6	2.1	162	3	0.00884	0.00034	178	7
	MMg	14	169.2	2.1	0.1913	0.0038	0.0266	0.00033	0.529721	169.2	2.1	178	3	0.00921	0.00036	185	7
	MMg	15			1.4756	0.0295	0.0327	0.00044	0.558365	207.4	2.8	920	12	0.01586	0.00077	318	15
Middle Jurassic rocks
	TMg	1	167	2.1	0.1774	0.0039	0.02624	0.00034	0.50776	167	2.1	166	3	0.0096	0.00036	193	7
	TMg	2	168.9	1.9	0.1835	0.0033	0.02655	0.0003	0.532017	168.9	1.9	171	3	0.00863	0.00025	174	5
	TMg	3	170.9	2.1	0.1747	0.0041	0.02687	0.00034	0.474579	170.9	2.1	164	4	0.00903	0.00036	182	7
	TMg	4	175.8	2.2	0.1936	0.0045	0.02765	0.00035	0.478264	175.8	2.2	180	4	0.00923	0.00035	186	7
	TMg	5	165.3	1.8	0.1862	0.0033	0.02597	0.00028	0.51973	165.3	1.8	173	3	0.00834	0.00017	168	3
	TMg	6	171.6	2	0.1891	0.0034	0.02697	0.00032	0.550787	171.6	2	176	3	0.00901	0.00023	181	5
	TMg	7	173.3	1.9	0.2018	0.0043	0.02724	0.00031	0.471102	173.3	1.9	187	4	0.00921	0.00027	185	5
	TMg	8	175.2	2.5	0.1901	0.0051	0.02756	0.00039	0.466545	175.2	2.5	177	4	0.00986	0.00035	198	7
	TMg	9			0.199	0.0037	0.0255	0.00027	0.494859	162.3	1.7	184	3	0.00856	0.00022	172	4
	TMg	10			0.2548	0.0071	0.02793	0.00038	0.438756	177.6	2.4	230	6	0.0116	0.00045	233	9
	TMg	11	166.7	1.8	0.1802	0.0029	0.0262	0.00029	0.566689	166.7	1.8	168	2	0.0091	0.0002	183	4
	TMg	12	174.1	2	0.2041	0.0037	0.02738	0.00032	0.541853	174.1	2	189	3	0.01015	0.00025	204	5
	TMg	13	161	1.7	0.1789	0.003	0.02529	0.00027	0.53705	161	1.7	167	3	0.00806	0.00017	162	3
	CO	1	192.1	2.2	0.211	0.0029	0.03024	0.00034	0.633178	192.1	2.2	194	2	0.00889	0.00016	179	3
	CO	2	178.6	2	0.1929	0.0028	0.02809	0.00033	0.629117	178.6	2	179	2	0.00781	0.00013	157	3
	CO	3			0.2093	0.0029	0.02514	0.00027	0.612632	160.1	1.7	193	2	0.00782	0.00011	157	2
	CO	4			1.478	0.0208	0.12396	0.00152	0.656928	753.3	8.7	921	9	0.03264	0.00078	649	15
	CO	5			1.218	0.0704	0.04321	0.00161	0.541817	272.7	10	809	32	0.03889	0.00287	771	56
	CO	6			0.4518	0.0057	0.04746	0.00054	0.669726	298.9	3.3	379	4	0.00952	0.00017	192	3
	CO	7			2.8366	0.0354	0.20541	0.00237	0.678856	1204.3	12.7	1365	9	0.04109	0.00075	814	15	0.1065	0.0016	1745	30
	CO	8			0.2378	0.0052	0.02305	0.00029	0.498702	146.9	1.8	217	4	0.00777	0.00028	157	6
	CO	9	188.2	2.2	0.2038	0.0028	0.02963	0.00034	0.641032	188.2	2.2	188	2	0.00832	0.00018	168	4
	CO	10			0.8172	0.009	0.07396	0.00079	0.696212	460	4.7	607	5	0.01046	0.00014	210	3
	CO	11			1.4672	0.0172	0.11797	0.00132	0.690448	718.8	7.6	917	7	0.05549	0.00084	1092	16
	CO	12	1675	30	4.1173	0.0508	0.29072	0.00336	0.683641	1645.1	16.8	1658	10	0.07954	0.0014	1547	26	0.1027	0.0017	1675	30
	CO	13	199.8	2.3	0.2152	0.003	0.03147	0.00037	0.644708	199.8	2.3	198	3	0.00826	0.00015	166	3
	CO	14			0.6931	0.0093	0.05326	0.00065	0.672858	334.5	4	535	6	0.013	0.00025	261	5
	CO	15			0.243	0.0031	0.03089	0.00033	0.642029	196.1	2.1	221	3	0.01331	0.00024	267	2
	CO	16			0.197	0.0026	0.02663	0.0003	0.649227	169.4	1.9	183	2	0.00816	0.00015	164	2
	CO	17	1675	30	3.9712	0.0434	0.27997	0.00282	0.677716	1591.2	14.2	1628	9	0.08653	0.0015	1677	28	0.1029	0.0015	1675	30
	CO	18			0.2258	0.0036	0.02619	0.00029	0.570437	166.6	1.8	207	3	0.01063	0.0004	214	8
	CO	19	169.8	1.7	0.185	0.0026	0.02669	0.00027	0.584199	169.8	1.7	172	2	0.008	0.0002	161	4
	CO	20	1665	30	3.8925	0.0633	0.2759	0.00295	0.549386	1570.7	14.9	1612	13	0.08951	0.00383	1733	71	0.1023	0.002	1665	30
	CO	21			0.2237	0.0045	0.02788	0.00033	0.507127	177.3	2.1	205	4	0.00904	0.00037	182	8
Precambrian granite gneiss (not discussed in the text)
	Z11	1	1649	50	3.9478	0.0963	0.28311	0.00455	0.550172	1607	22.9	1624	20	0.06034	0.00323	1184	62	0.1011	0.0028	1649	50
	Z11	2	1556	30	3.5957	0.0583	0.27035	0.00341	0.614018	1542.6	17.3	1549	13	0.08254	0.00282	1603	53	0.0965	0.0019	1556	30
	Z11	3	1600	40	3.6291	0.063	0.26824	0.00351	0.601928	1531.9	17.9	1556	14	0.08093	0.00287	1573	54	0.0981	0.002	1600	40
	Z11	4	1678	30	4.0758	0.0578	0.28692	0.00343	0.644528	1626.1	17.2	1650	12	0.08265	0.00212	1605	40	0.103	0.0018	1678	30
	Z11	7	1665	30	4.0838	0.0491	0.28956	0.00308	0.662609	1639.3	15.4	1651	10	0.08552	0.00172	1659	32	0.1023	0.0016	1665	30
	Z11	6	1708	40	4.0046	0.0625	0.27751	0.00344	0.621947	1578.8	17.4	1635	13	0.07726	0.00237	1504	45	0.1047	0.002	1708	40
	Z11	8	1702	40	4.2009	0.0736	0.29221	0.00364	0.579465	1652.6	18.2	1674	14	0.08889	0.00308	1721	57	0.1043	0.0022	1702	40
	Z11	9	1678	40	3.837	0.0692	0.2704	0.00337	0.56851	1542.8	17.1	1601	15	0.08134	0.00293	1581	55	0.1029	0.0022	1678	40
	Z11	10	1645	40	3.8729	0.0643	0.27812	0.00347	0.600761	1581.9	17.5	1608	13	0.07995	0.00279	1555	52	0.101	0.002	1645	40
	Z11	11	1679	30	3.9503	0.0498	0.27825	0.00292	0.639775	1582.5	14.7	1624	10	0.08237	0.00195	1600	36	0.103	0.0017	1679	30
	Z11	12	1662	40	3.8016	0.0622	0.27036	0.0033	0.597954	1542.6	16.7	1593	13	0.07792	0.00276	1517	52	0.102	0.002	1662	40
	Z11	13	1685	30	3.8559	0.0594	0.27056	0.00317	0.605367	1543.7	16.1	1605	12	0.08527	0.00289	1654	54	0.1034	0.0019	1685	30
	Z11	14	1642	40	3.8165	0.0784	0.27492	0.00381	0.559264	1565.7	19.3	1596	17	0.08561	0.0041	1660	76	0.1007	0.0024	1642	40
